# Supplementary material for: A fluorimetric and colorimetric dual-signal sensor for hydrogen peroxide and glucose based on the intrinsic peroxidase-like activity of cobalt and nitrogen co-doped carbon dots and inner filter effect
Source: Royal Society of Chemistry journal article supplement (doi:10.1039/d1ay00781e), 2021-01-01
Supplement: d1ay00781e1.pdf [file d1ay00781e1.pdf]

## **A fluorimetric and colorimetric dual-signal sensor for hydrogen peroxide and glucose based on the intrinsic peroxidase-like activity cobalt and nitrogen co-doped carbon dots and inner filter effect**

Guo-Qi Zhang<sup>a</sup>; Yong-sheng Li<sup>a\*</sup>; Wei-Ping Liu<sup>b</sup>; Xiu-Feng Gao<sup>c\*\*</sup>

<sup>a</sup>: School of Chemical Engineering, Sichuan University, Chengdu 610065, China

<sup>b</sup>: Department of Clinical laboratory, Zigong First People's Hospital, Zigong 643000, China

<sup>c</sup>: West China School of Basic Medical Sciences & Forensic Medicine, Sichuan University, Chengdu 610041, China

\*Corresponding author: E-mail: li-yongsheng@scu.edu.cn; \*\*xiufengg@163.com

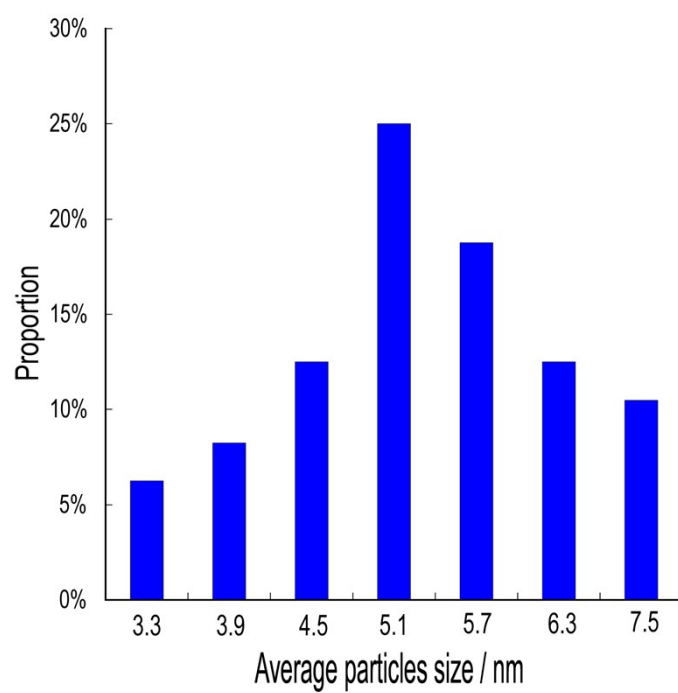

Fig. S1 the size distribution histogram of Co-N-CDs.

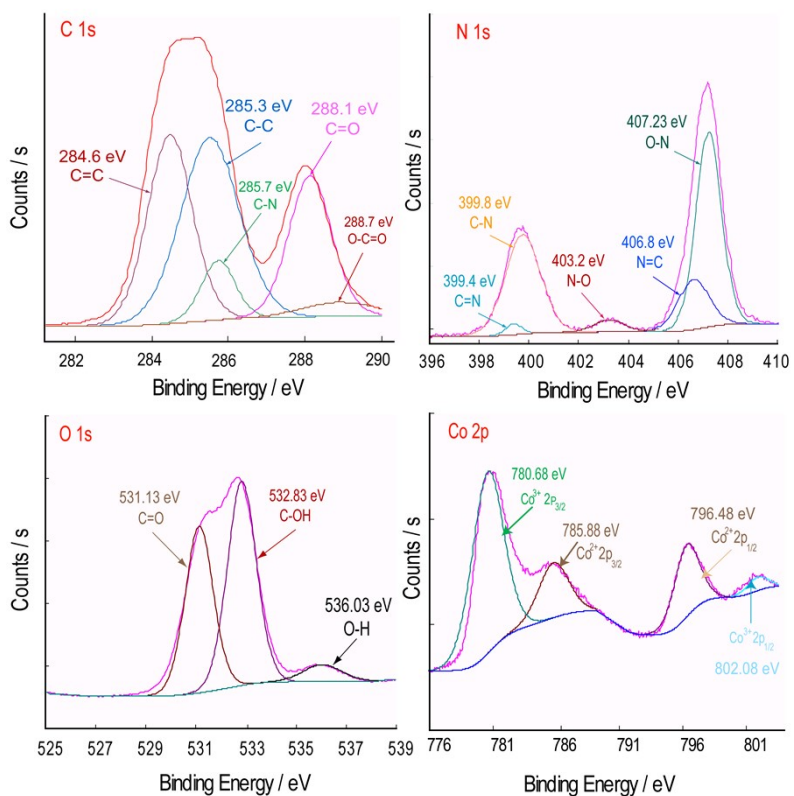

Fig. S2 the XPS high-resolution C1s, N1s, O1s and Co 2p curves of Co-N-CDs.

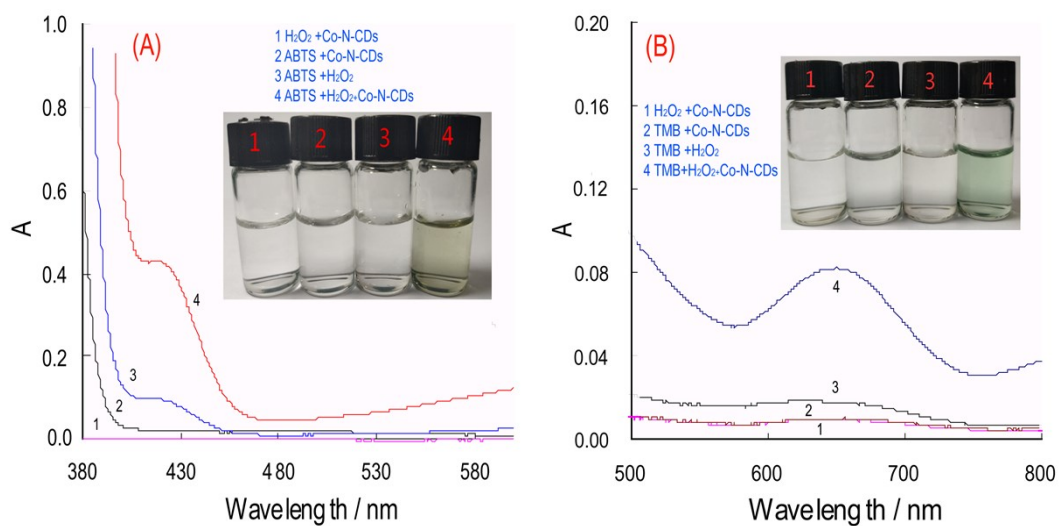

Fig. S3 the visible spectra scan curve of the oxidation of ABTS (A) or TMB (B) by  $\text{H}_2\text{O}_2$  catalyzed by Co-N-CDs. The concentrations of TMB and ABTS are 100 mM. Other experimental conditions are the same as those described in “Peroxidase-like catalytic activity of Co-N-CDs”.

Table S1. Comparison of the kinetic parameters ( $K_m$  and  $V_m$ ) between Co-N-CDs and HRP.

| Catalyst | Substrate                     | $K_m$ (mM) | $V_{max}$ (mM·min <sup>-1</sup> ) |
|----------|-------------------------------|------------|-----------------------------------|
| Co-N-CDs | H <sub>2</sub> O <sub>2</sub> | 2.10       | 0.48                              |
| HRP      | H <sub>2</sub> O <sub>2</sub> | 6.78       | 0.15                              |
| Co-N-CDs | GA                            | 31.98      | 0.031                             |
| HRP      | GA                            | 40.20      | 0.025                             |

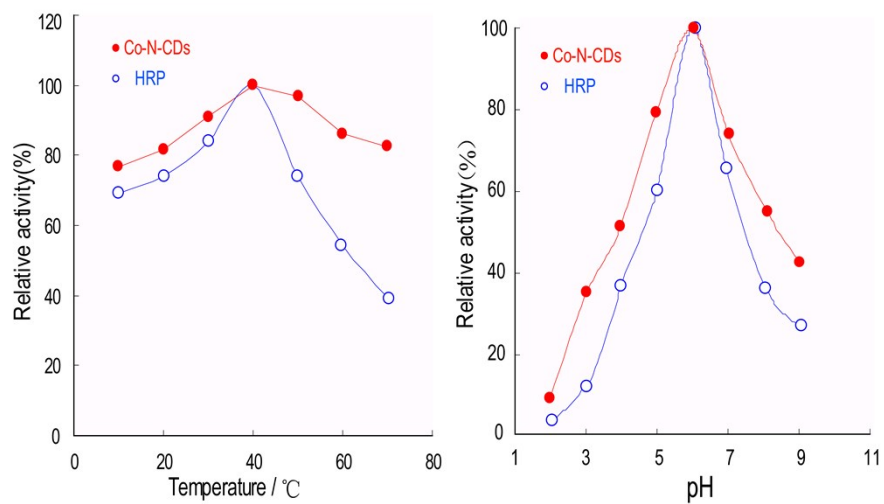

Fig. S4 Influences of temperature and pH on the catalytic performance of Co-N-CDs and HRP. The maximum point in each curve was set as 100%. The HRP concentration was 300 U·L<sup>-1</sup>.

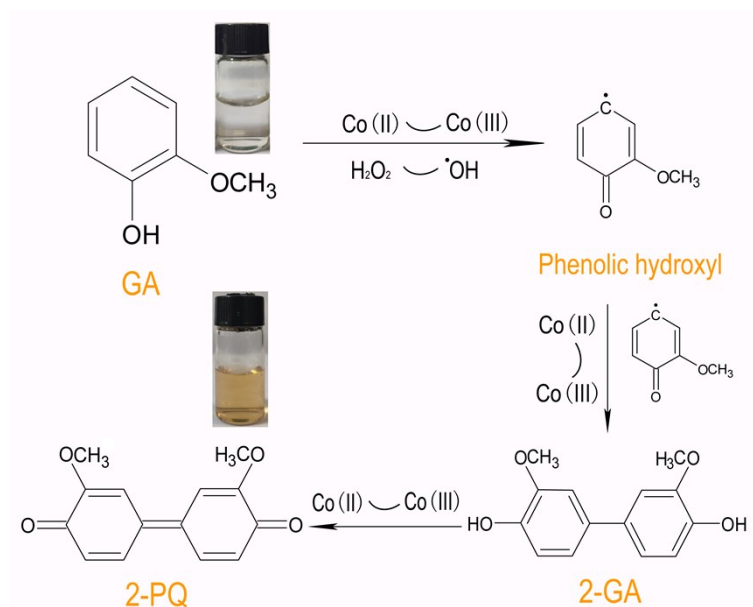

Fig. S5 Schematic of Co-N-CDs catalyzing H<sub>2</sub>O<sub>2</sub> oxidation of GA to generate an amber product 2-PQ.

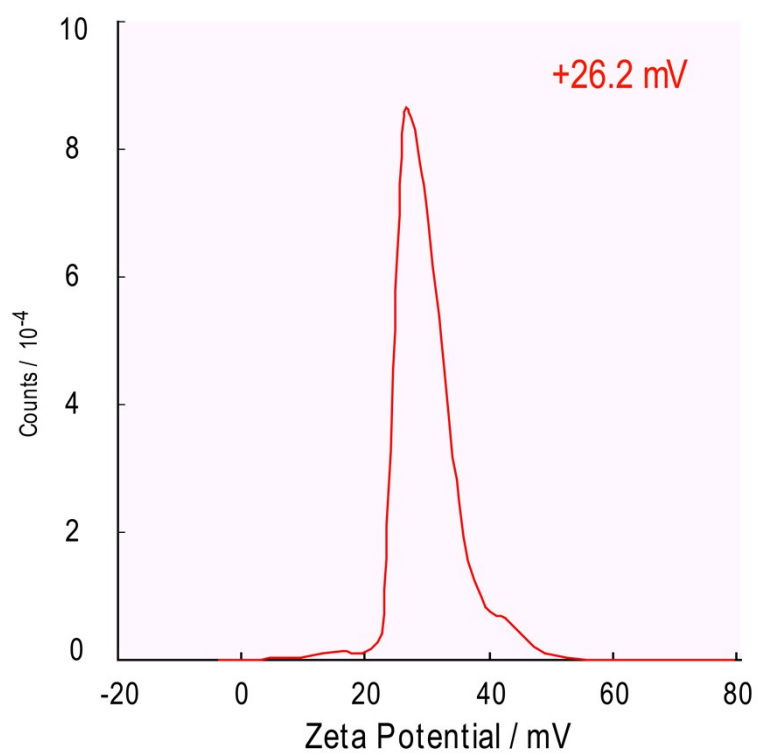

Fig. S6 The zeta potential of the Co-N-CDs.



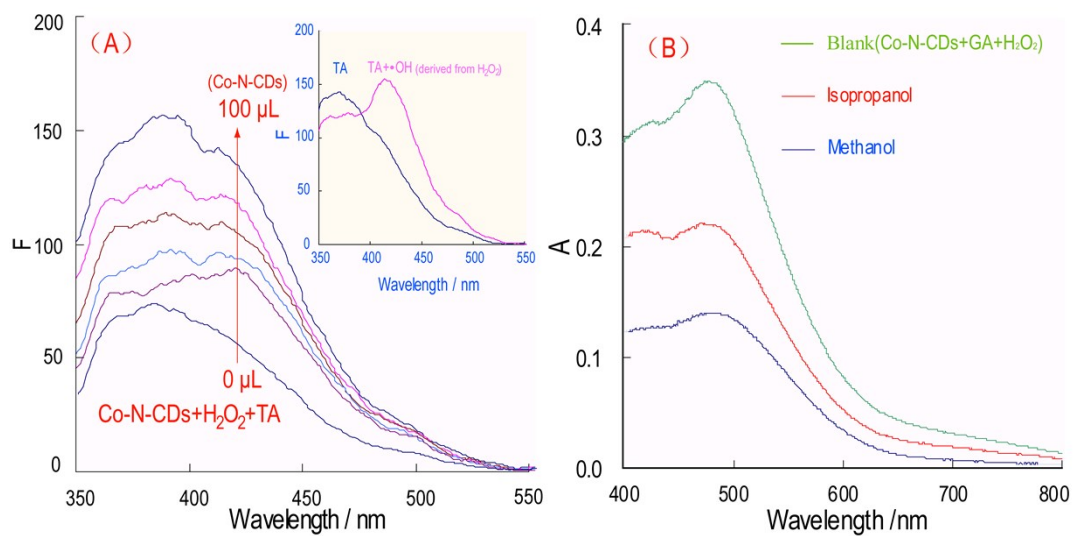

Fig. S7 (A) Verification that Co-N-CDs promote the decomposition of H<sub>2</sub>O<sub>2</sub> to generate hydroxyl radicals; (B) Effect of different hydroxyl radical scavengers on the absorption spectra of the Co-N-CDs/H<sub>2</sub>O<sub>2</sub>/GA reaction system.

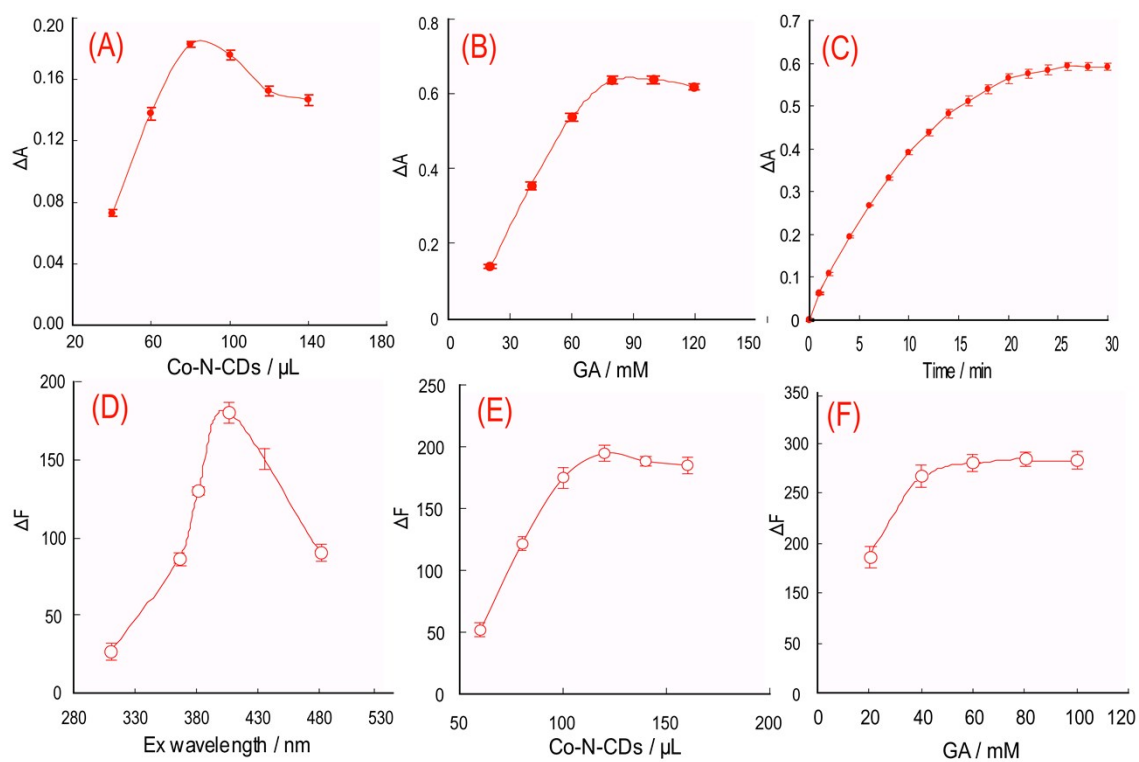

Fig. S8 Effects of (a) amount of Co-N-CDs, (b) concentration of GA and (c) reaction time for colorimetric method. The effects of (D) excitation wavelengths, (E) amount of Co-N-CDs and (F) concentration of GA for fluorescence method.

Table S2. Comparison of the analytical performance for the determination of glucose by the different nanozymes.

| nanozymes                              | Method      | Linear range ( $\mu\text{M}$ ) | LOD ( $\mu\text{M}$ ) | Refs. |
|----------------------------------------|-------------|--------------------------------|-----------------------|-------|
| CDs                                    | colorimetry | 1-500                          | 0.4                   | 6     |
| ZnFe <sub>2</sub> O <sub>4</sub> -CNTs | colorimetry | 0.8-250                        | 0.58                  | 8     |
| B-CDs                                  | fluorometry | 8-80                           | 8                     | 9     |
| V <sub>2</sub> O <sub>5</sub>          | colorimetry | 200-5000                       | 80                    | 14    |
| Ni-Pd                                  | colorimetry | 5-500                          | 4.2                   | 16    |
| Au-Ni-C <sub>3</sub> N <sub>4</sub>    | colorimetry | 0.5-30                         | 1.7                   | 18    |
| Ag <sub>2</sub> WO <sub>4</sub>        | colorimetry | 27.7-330                       | 2.6                   | 20    |
| N-CDs                                  | colorimetry | 25-375                         | 16                    | 40    |
| CuO-CDs                                | colorimetry | 2-100                          | 0.59                  | 42    |
| Fe-CDs                                 | fluorometry | 0-300                          | 2.5                   | 52    |
| Cu-CDs                                 | colorimetry | 100-2000                       | 100                   | 53    |
| Co-N-CDs                               | colorimetry | 2-100                          | 1.16                  | this  |
|                                        | fluorometry | 0.4-40                         | 0.18                  | work  |
